# Supplementary material
Source: PubMed Central journal article supplement (PMC3738374)
Supplement: supp_jn.109.104901_nut104901ST01-ST04_SF01-SF03.pdf [file supp_jn.109.104901_nut104901ST01-ST04_SF01-SF03.pdf]

## Online Supporting Material

**Supplemental Table 1** Primers used for cloning novel porcine selenoprotein gene fragments

| Gene                       | Length (bp) | Primer pairs (5' to 3' direction)                               |
|----------------------------|-------------|-----------------------------------------------------------------|
| <i>Gpx2</i> <sup>1</sup>   | 924         | CTTACATTGCCAAGTCCTTCTACG<br>3'-site adapter primer <sup>3</sup> |
| <i>Sepp1</i> <sup>1</sup>  | 1705        | ATCAACAAGAAGAAAACCAAACAGA<br>3'-site adapter primer             |
| <i>Sepn1</i> <sup>1</sup>  | 595         | CTCTGAATGTGGACATGGAGTGG<br>TGGAC(T/C)AC(A/G)GTGCC(A/G)TTGGGCA   |
| <i>Sephs2</i> <sup>2</sup> |             |                                                                 |
| 5'-fragment                | 571         | GTCCGCTCCGTATTAAGTGG<br>TGTGCCAACGTGCTGAGTG                     |
| 3'-fragment                | 1661        | TCCCTACATGATGGGGCGCA<br>3'-site adapter primer                  |
| <i>Sep15</i> <sup>2</sup>  |             |                                                                 |
| 5'-fragment                | 538         | AGACGGCGGCGATGGCG<br>CAAGGTAACAAAAGGACAGGACGAAAT                |
| 3'-fragment                | 821         | CGACAACGGGAACATTGCTGAA<br>3'-site adapter primer                |

<sup>1</sup>Incomplete CDS.

<sup>2</sup>After assembling the respective 5'- and 3'-fragments, we obtained the complete CDS of 2203 bp for *Sephs2* and 1230 bp for *Sep15*.

<sup>3</sup>The sequence of 3'-site adapter primer was 5'- CTGATCTAGAGGTACCGGATCC -3', similar to the adapter sequence of oligo d(T)<sub>18</sub>-adapter primer. The later was initially used to amplify the poly A+ RNA in the reverse transcription with total RNA as template, and its sequence was 5'-CTGATCTAGAGGTACCGGATCCTTTTTTTTTTTTTTTTTTTVN-3'. V = A or C or G; N = A or C or G or T.

## Online Supporting Material

**Supplemental Table 2** Primers used for the Q-PCR of the target and reference genes

| Protein <sup>1</sup> | Gene                       | Accession number | Primer pairs (5' to 3' direction)                   |
|----------------------|----------------------------|------------------|-----------------------------------------------------|
| GPX1                 | <i>Gpx1</i>                | AF532927         | GATGCCACTGCCCTCATGA<br>TCGAAGTTCCATGCGATGTC         |
| GPX4                 | <i>Gpx4</i>                | NM_214407        | TGAGGCAAGACGGAGGTAAACT<br>TCCGTAAACCACACTCAGCATATC  |
| TrxR1                | <i>Txnrd1</i>              | AF537300         | GATTTAACAAGCGGGTCATGGT<br>CAACCTACATTCACACACGTTCTCT |
| D1                   | <i>Dio1</i>                | AY533206         | CATGGCCAAGAACCCTCACT<br>CCAGAAATACTGGGCACTGAAGA     |
| D3                   | <i>Dio3</i>                | AY533208         | TGAAGTGGAGCTCAACAGTGATG<br>TGTCGTCAGACACGCAGATAGG   |
| SelK                 | <i>Selk</i>                | DQ372075         | CAGGAAACCCCTAGAAGAA<br>CTCATCCACCGGCCATTG           |
| SelW                 | <i>Sepw1</i>               | NM_213977        | CACCCCTGTCTCCCTGCAT<br>GAGCAGGATCACCCCAAACA         |
| GPX2                 | <i>Gpx2</i> <sup>2</sup>   | DQ898282         | AGAATGTGGCCTCGCTCTGA<br>GGCATTGCAGCTCGTTGAG         |
| SPS2                 | <i>Sephs2</i> <sup>2</sup> | EF033624         | TGGCTTGATGCACACGTTTAA<br>TGCGAGTGTCCCAGAATGC        |
| Sep15                | <i>Sep15</i> <sup>2</sup>  | EF178474         | ACAGCCCTGCCAAGCAGAT<br>AACAGGGAGGCTGGGTAACAC        |
| SelN                 | <i>Sepn1</i> <sup>2</sup>  | EF113595         | ACCTGGTCCCTGGTGAAAGAG<br>AGGCCAGCCAGCTTCTTGT        |
| SelP                 | <i>Sepp1</i> <sup>2</sup>  | EF113596         | AACCAGAAGCGCCAGACACT<br>TGCTGGCATATCTCAGTTCTCAGA    |
| $\beta$ -actin       | <i>Actb</i>                | AY550069         | CCCAAAGCCAACCGTGAGAA<br>CCACGTACATGGCTGGGGTG        |
| GAPDH                | <i>Gapdh</i>               | AF017079         | CAGCAATGCCTCCTGTACCA<br>CCACGATGCCGAAGTTGTC         |

<sup>1</sup>D1, iodothyronine deiodinase 1; D3, iodothyronine deiodinase 3; GAPDH, glyceraldehyde 3-phosphate dehydrogenase; GPX1, glutathione peroxidase 1; GPX2, glutathione peroxidase 2; GPX4, glutathione peroxidase 4; SelK, selenoprotein K; SelN, selenoprotein N; SelP, selenoprotein P; SelW, selenoprotein W; Sep15, selenoprotein 15kDa; SPS2, selenophosphate synthetase 2; and TrxR1, thioredoxin reductase 1.

<sup>2</sup>Cloned in this study.

## Online Supporting Material

**Supplemental Table 3** Growth performance of pigs fed diets containing 0, 0.3, or 3.0 mg Se/kg for 8 wk<sup>1</sup>

| Measures                       | BD             | BD + 0.3 mg Se/kg | BD + 3.0 mg Se/kg |
|--------------------------------|----------------|-------------------|-------------------|
| Initial body weight, <i>kg</i> | 10.3 ± 0.3     | 10.3 ± 0.2        | 10.3 ± 0.2        |
| Final body weight, <i>kg</i>   | 47.3 ± 0.7     | 48.2 ± 0.4        | 45.7 ± 0.3        |
| Feed intake, <i>g/d</i>        | 1,258.2 ± 28.3 | 1,226.4 ± 30.8    | 1,163.8 ± 21.5    |
| Body weight gain, <i>g/d</i>   | 665.4 ± 16.4   | 665.9 ± 21.3      | 627.7 ± 11.1      |
| Gain /Feed                     | 0.53 ± 0.03    | 0.54 ± 0.03       | 0.54 ± 0.02       |

<sup>1</sup> Values are mean ± SE (*n* = 10).

## Online Supporting Material

**Supplemental Table 4** Tissue enzyme activities of pigs fed diets containing 0, 0.3, or 3.0 mg Se/kg for 8 wk<sup>1</sup>

| Measures <sup>2</sup>                           | Liver        | Testis       | Thyroid     | Pituitary   |
|-------------------------------------------------|--------------|--------------|-------------|-------------|
| Glutathione reductase, <i>EU/mg protein</i>     |              |              |             |             |
| BD                                              | 49.3 ± 1.3   | 35.6 ± 2.4   | 12.8 ± 0.8  | 5.6 ± 0.3   |
| BD + 0.3 mg Se/kg                               | 50.2 ± 1.6   | 26.3 ± 1.1   | 15.1 ± 1.1  | 5.6 ± 0.0   |
| BD + 3.0 mg Se/kg                               | 42.4 ± 3.1   | 34.1 ± 4.7   | 13.6 ± 0.5  | 5.7 ± 0.4   |
| Glutathione S-transferase, <i>EU/mg protein</i> |              |              |             |             |
| BD                                              | 92.9 ± 8.3   | 51.2 ± 2.1   | 12.3 ± 2.8  | 29.4 ± 3.5  |
| BD + 0.3 mg Se/kg                               | 94.0 ± 10.6  | 53.1 ± 2.3   | 9.0 ± 2.6   | 24.9 ± 1.9  |
| BD + 3.0 mg Se/kg                               | 86.0 ± 6.0   | 48.1 ± 4.6   | 9.2 ± 2.7   | 27.9 ± 4.3  |
| Superoxide dismutase, <i>EU/mg protein</i>      |              |              |             |             |
| BD                                              | 459.6 ± 34.8 | 206.2 ± 8.2  | 78.3 ± 7.7  | 124.8 ± 6.5 |
| BD + 0.3 mg Se/kg                               | 470.2 ± 29.2 | 211.9 ± 14.5 | 82.4 ± 6.4  | 126.9 ± 3.6 |
| BD + 3.0 mg Se/kg                               | 466.3 ± 28.4 | 199.0 ± 9.6  | 68.5 ± 12.4 | 134.5 ± 6.2 |

<sup>1</sup>Values are mean ± SE ( $n = 6$ ).

<sup>2</sup>The units for the enzyme activities were described in the “Materials and methods” section.

## Online Supporting Material

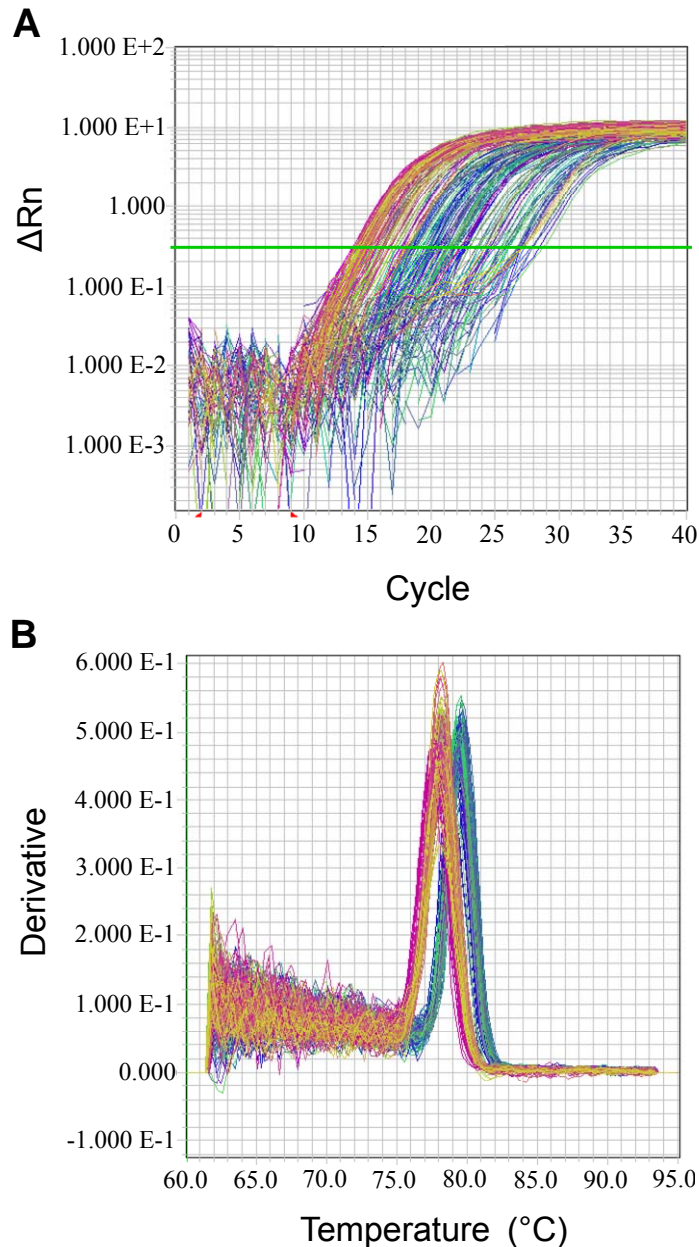

**Supplemental Figure 1.** Amplification plots (A) and dissociation curves (B) in the Q-PCR detecting mRNA abundances. Taking *Gpx1* (in cold color) and *Actb* (in warm color) as an example, the assay for mRNA abundances of every two genes in the four tissues (liver, testis, thyroid, and pituitary) were conducted on the same 384-well plate at one time. (A) The cycle threshold (Ct) value was the projection of crossing point on X-axis of  $\Delta Rn$  threshold line ( $Y = 0.3$ ) and the amplification plot in the increased logarithmic phase. The smaller Ct value represented the higher abundance of initial mRNA template that could be detected after less PCR cycles. (B) The single sharp dissociation curve cluster of *Actb* (and *Gpx1*) represented specific amplification of the genes.

## Online Supporting Material

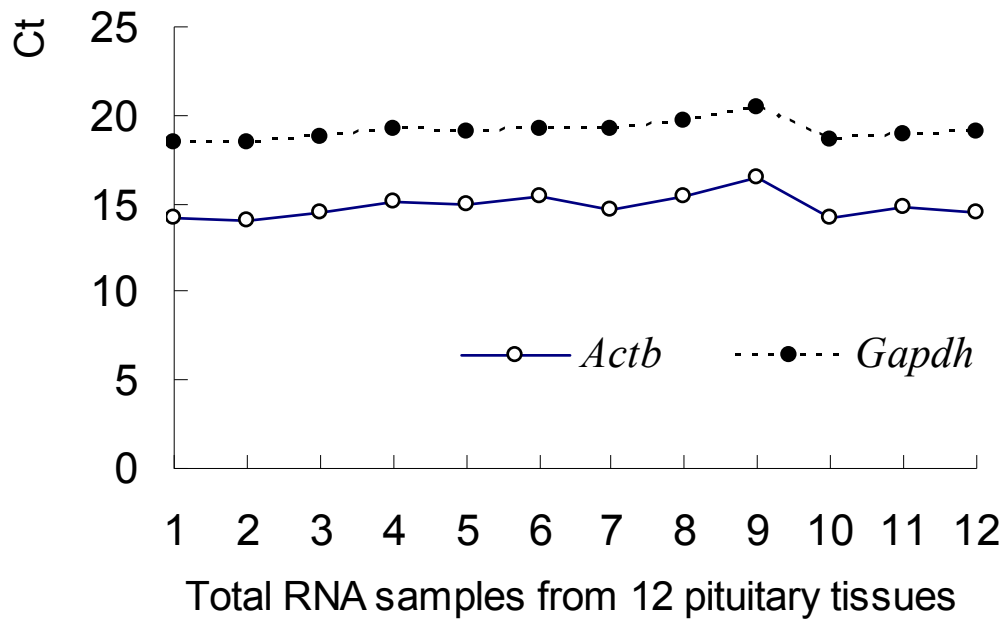

**Supplemental Figure 2.** Cycle threshold (Ct) of mRNA abundances of *Actb* and *Gapdh* in the 12 porcine pituitary samples. Each point represented the average value of duplicated assays for one pig. Pearson correlation analysis was performed to evaluate the consistency of the two reference (housekeeping) genes with a coefficient of 0.94 ( $P < 0.01$ ,  $n = 12$ ).

Online Supporting Material

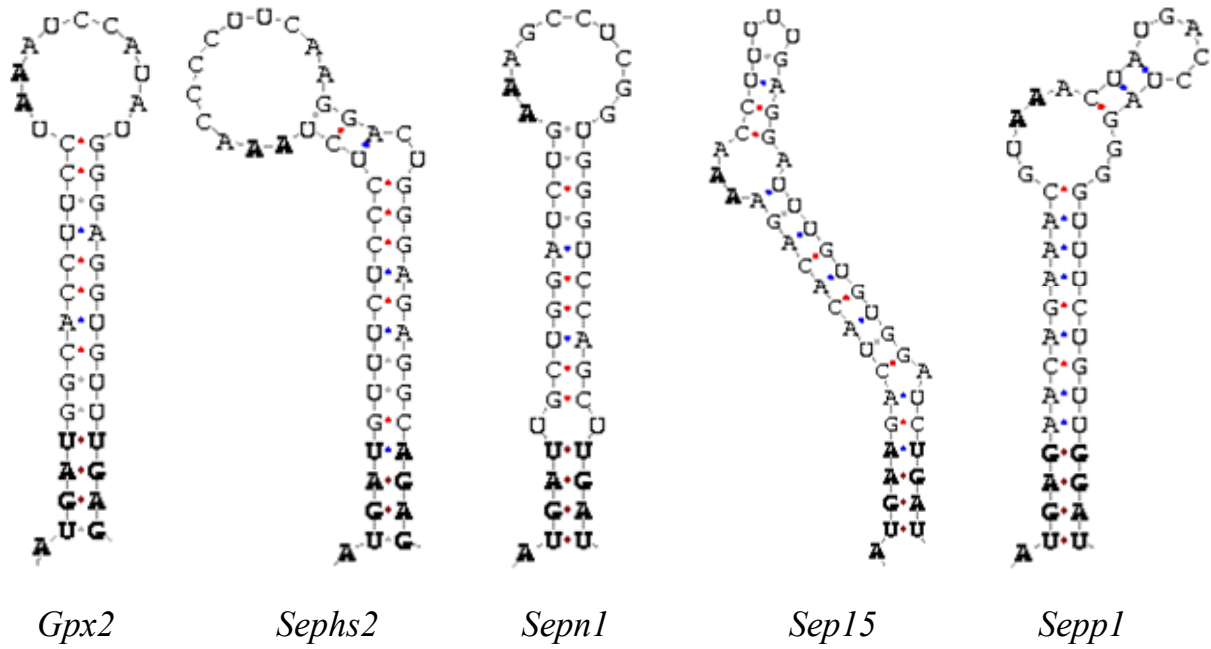

**Supplemental Figure 3.** The secondary structures of SECIS elements of the five novel porcine selenoprotein genes. Form 1: *Gpx2*, *Sephs2*, and *Sepn1*; and Form 2: *Sep15* and *Sepp1*. Conserved nucleotides were shown in bold.
